# Supplementary material for: News events and their relationship with US vape sales: an interrupted time series analysis
Source: Springer Nature journal article supplement (doi:10.1186/s12889-022-12858-x), 2022-03-10
Supplement: MOESM1 [file 20207864]

Supplementary Table A: Unadjusted model of the interrupted time series design with segmented regression analysis across various vaping-related events

| Variable                                                            | Estimate<br>(95% CI)       | p                 | Interaction<br>(95% CI)    | p<br>interaction  |
|---------------------------------------------------------------------|----------------------------|-------------------|----------------------------|-------------------|
| AR(1)                                                               | -0.550<br>(-0.809, -0.291) | p<0.001           | N/A                        | N/A               |
| Weeks                                                               | 0.011<br>(0.007, 0.014)    | p<0.001           | N/A                        | N/A               |
| CDC announcing an investigation into vaping-related illnesses       | 0.066<br>(0.033, 0.099)    | <b>p&lt;0.001</b> | -0.067<br>(-0.081, -0.054) | <b>p&lt;0.001</b> |
| Trump administration plan to ban some flavored vaping products      | 0.007<br>(-0.029, 0.044)   | 0.692             | 0.043<br>(0.022, 0.064)    | p<0.001           |
| FDA warns consumers against the use of vape products containing THC | -0.016<br>(-0.048, 0.016)  | 0.327             | 0.024<br>(0.004, 0.044)    | 0.018             |
| CDC announces link between Vitamin E acetate and EVALI              | 0.016<br>(-0.014, 0.045)   | 0.309             | -0.020<br>(-0.033, -0.006) | p<0.001           |

Bold p-values indicate statistical significance ( $P<0.05$ ) for both the news event (key dependent variable) and the corresponding interaction term ( $P<0.05$ ).

Supplementary Table B: Full model of the interrupted time series design with segmented regression analysis across various vaping-related events

| Variable                                                                     | Estimate<br>(95% CI)       | P                 | Interaction<br>(95% CI)    | P<br>interaction  |
|------------------------------------------------------------------------------|----------------------------|-------------------|----------------------------|-------------------|
| AR(1)                                                                        | -0.576<br>(-0.836, -0.316) | p<0.001           | N/A                        | N/A               |
| Weeks                                                                        | 0.009<br>(0.006, 0.013)    | p<0.001           | N/A                        | N/A               |
| EVALI<br>hospitalizations                                                    | -0.002<br>(-0.007, 0.003)  | 0.527             | N/A                        | N/A               |
| Log weekly cigarette<br>sales                                                | 0.546<br>(0.296, 0.796)    | p<0.001           | N/A                        | N/A               |
| CDC announcing an<br>investigation into<br>vaping-related<br>illnesses       | 0.066<br>(0.036, 0.092)    | <b>p&lt;0.001</b> | -0.064<br>(-0.075, -0.052) | <b>p&lt;0.001</b> |
| Trump administration<br>plan to ban some<br>flavored vaping<br>products      | 0.014<br>(-0.018, 0.045)   | 0.398             | 0.038<br>(0.020, 0.056)    | p<0.001           |
| FDA warns<br>consumers against the<br>use of vape products<br>containing THC | -0.006<br>(-0.034, 0.021)  | 0.651             | 0.029<br>(0.012, 0.046)    | p<0.001           |
| CDC announces link<br>between Vitamin E<br>acetate and EVALI                 | 0.029<br>(0.003, 0.055)    | <b>0.029</b>      | -0.022<br>(-0.033, -0.010) | <b>p&lt;0.001</b> |

Bold p-values indicate statistical significance ( $P<0.05$ ) for both the news event (key dependent variable) and the corresponding interaction term ( $P<0.05$ ).

Supplementary Table C: Augmented Dickey Fuller Test Results

| Lag                          | ADF    | p value |
|------------------------------|--------|---------|
| Type 1: No drift no trend    |        |         |
| 0                            | 3.72   | 0.99    |
| 1                            | 5.93   | 0.99    |
| 2                            | 2.94   | 0.99    |
| 3                            | 2.90   | 0.99    |
| Type 2: With drift no trend  |        |         |
| 0                            | 0.131  | 0.961   |
| 1                            | -0.165 | 0.929   |
| 2                            | -0.352 | 0.904   |
| 3                            | -0.467 | 0.870   |
| Type 3: With drift and trend |        |         |
| 0                            | -3.88  | 0.0274  |
| 1                            | -1.67  | 0.6927  |
| 2                            | -2.00  | 0.5580  |
| 3                            | -1.52  | 0.7537  |
